# Supplementary material for: Function of Cyclophilin1 as a long-distance signal molecule in the phloem of tomato plants
Source: PubMed Central journal article supplement (PMC5444435; doi:10.1093/jxb/erw487), 2017-01-04
Supplement: erw487_suppl_supplementary_figures_S1_S4.pdf [file erw487_suppl_supplementary_figures_S1_S4.pdf]

## Supplementary Figure 1

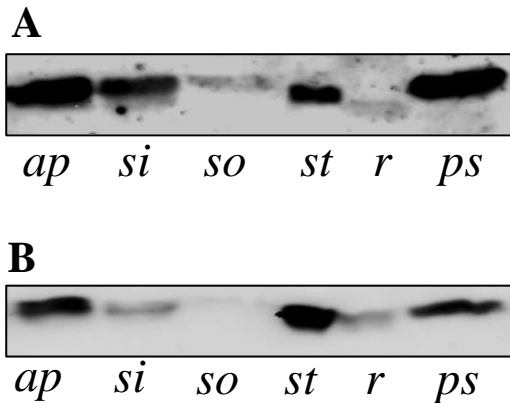

### **Supplementary figure S1. Spatial distribution of Cyp1 proteins in different organs.**

Anti-Cyclophilin Western-blot analyses on protein extracts from different plant organs using an anti-AtCyp18-3/ROC1 antiserum. Experiments were performed on samples obtained from cucumber (A) and pumpkin (B). Proteins were extracted from the following organs: shoot apex (*ap*), sink leaf (*si*), source leaf (*so*), stem (*st*), root (*r*), and phloem-sap (*ps*).

## Supplementary Figure 2

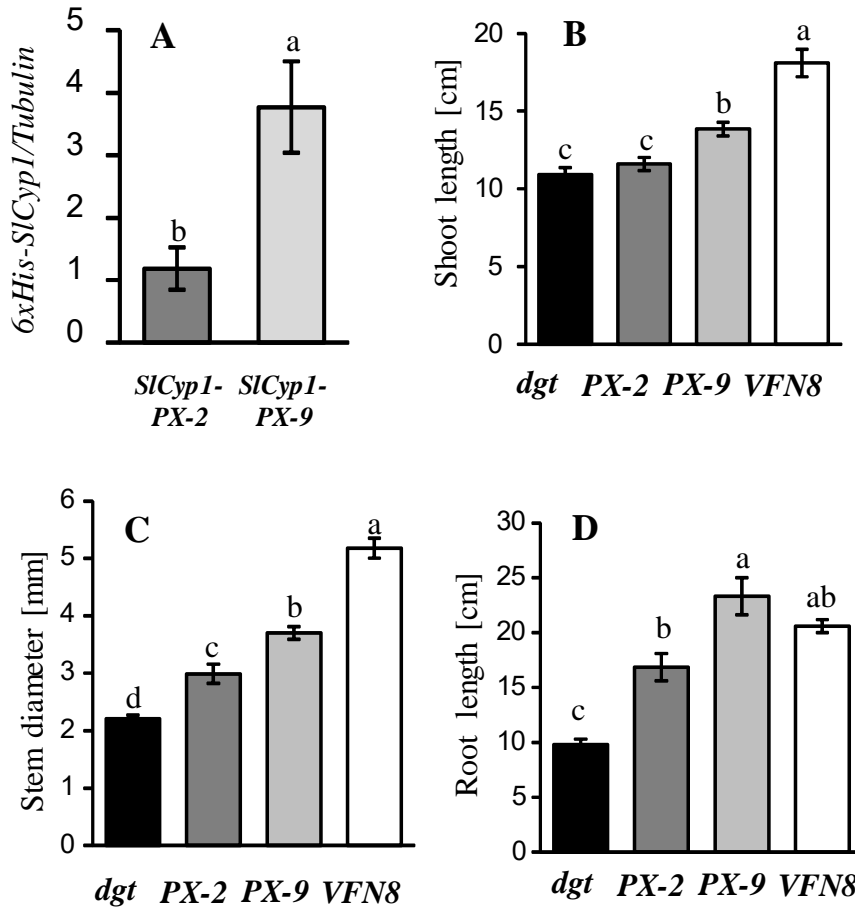

**Supplementary figure S2. Effect of phloem-specific expression of *SlCyp1* on shoot and root growth.** (A) Relative expression levels of *6xHis-SlCyp1* in stems of two transgenic *dgt* mutant lines expressing *SlCyp1* under the *AtSuc2* promoter (*SlCyp1-PX* lines). Measurements of Shoot length (B), stem diameter (C) and root length (D) of *dgt* mutants (black bars), *SlCyp1-PX-2* (dark grey bars), *SlCyp1-PX-9* (light grey bars) and *VFN8* control plants (empty bars). Data represents means of 5 replications (for A) and 10 replications (for B-D) ( $\pm$ SE). Identical letters indicate no significant differences between genotypes at  $p < 0.05$  by Tukey's HSD-test.

### Supplementary Figure 3

|        |     |                                                               |     |
|--------|-----|---------------------------------------------------------------|-----|
| HsCypA | 1   | MVNPTVFFDIAVDGEPLGRVSFELFADKVPKTAENFRALSTGEKGF-----YKGS       | 53  |
|        |     | M NP VFFD+ + G P GRV ELFAD PKTAENFRAL TGEKG G YKGS F          |     |
| SlCyp1 | 1   | MANPKVFFDLTIGGAPAGRVVMELEFADTTPKTAENFRALCTGEKGVGKMGKPLHYKGSTF | 60  |
| HsCypA | 54  | HR IIPGFMCQGGDFTRHNGTGGKSIYGEKFEDENFILKHTGPGILSMANAGPNTNGSQFF | 113 |
|        |     | HR+IPGFMCQGGDFT NGTGG+SIY G KF DENF+ KHTGPGILSMANAGP TNGSQFF  |     |
| SlCyp1 | 61  | HRVIPGFMCQGGDFTAGNGTGGESIYGAKFNDENFVKKHTGPGILSMANAGPGTNGSQFF  | 120 |
| HsCypA | 114 | ICTAKTEWLDGKHVVVFGKVKEGMNIVEAMERFGSRNGKTSKKITIADCGQL          | 164 |
|        |     | ICTAKTEWL+GKHVVVFG+V EGM++++ E GS +G+ SK + IADCGQL            |     |
| SlCyp1 | 121 | ICTAKTEWLNKGKHVVVFGQVVEGMDVIKAEAVGSSSGRCSKPVVIADCGQL          | 171 |

**Supplementary figure S3. Homology of the human CypA and SlCyp1.** Protein alignment of the human cyclophilin A protein (HsCypA) and SlCyp1. Yellow marks the conserved active site residues chosen for site-directed mutagenesis according to Zydowsky *et al.*, 1992.

## Supplementary Figure 4

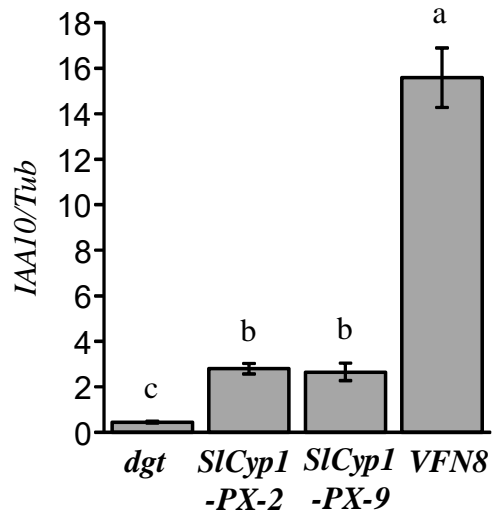

**Supplementary figure S4. Phloem-expression of *SlCyp1* restores auxin response in *dgt* roots.** Relative transcription level of *IAA10* (*Aux/IAA* family transcript) in roots of *dgt* mutants, *SlCyp1-PX-2*, *SlCyp1-PX-9* and *VFN8* root systems. The indicated data represents means of 6 biological replications  $\pm$  SE. Identical letters indicate no significant differences between auxin treatments in each genotype at  $p < 0.05$  by Tukey's HSD-test.
